# Supplementary material for: Triphenylphosphonium-functionalized dimeric BODIPY-based nanoparticles for mitochondria-targeting photodynamic therapy
Source: Royal Society of Chemistry journal article supplement (doi:10.1039/d4nr00694a), 2024-01-01
Supplement: d4nr00694a1.pdf [file d4nr00694a1.pdf]

## Supporting Information for

# Triphenylphosphonium-Functionalized Dimeric BODIPY-Based Nanoparticles for Mitochondria- Targeting Photodynamic Therapy

Chanwoo Kim, Duy Khuong Mai, Joomin Lee, Jinwoong Jo, Soyeon Kim, Isabel Wen Badon, Jong Min Lim, Ho-Joong Kim, Jaesung Yang

## Table of Contents

|                                                                              |    |
|------------------------------------------------------------------------------|----|
| S1. NMR and HR-MS spectra of BODIPY dimers .....                             | 2  |
| S2. Emission spectra of BODIPY dimers in different solvents .....            | 8  |
| S3. Emission spectra of BODIPY dimer-based NPs .....                         | 9  |
| S4. Determination of the $^1\text{O}_2$ quantum yield of BODIPY dimers ..... | 10 |
| S5. Theoretical characterization of the complete molecular structure .....   | 13 |

## S1. NMR and HR-MS spectra of BODIPY dimers

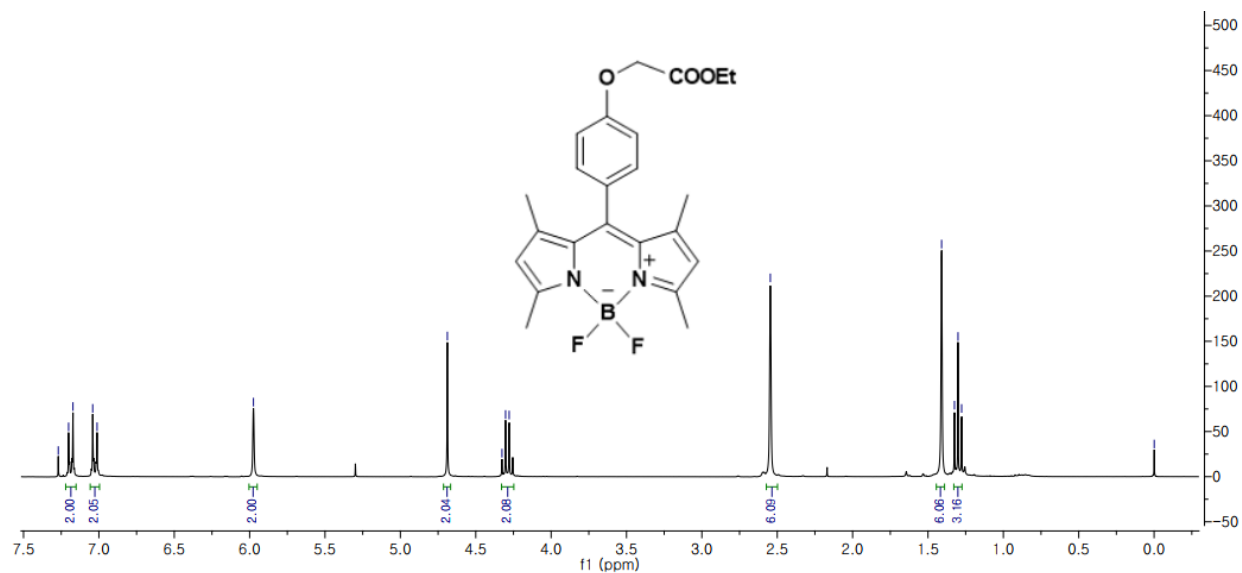

Figure S1. <sup>1</sup>H NMR spectrum of BODIPY 1 in CDCl<sub>3</sub> at 300 MHz.

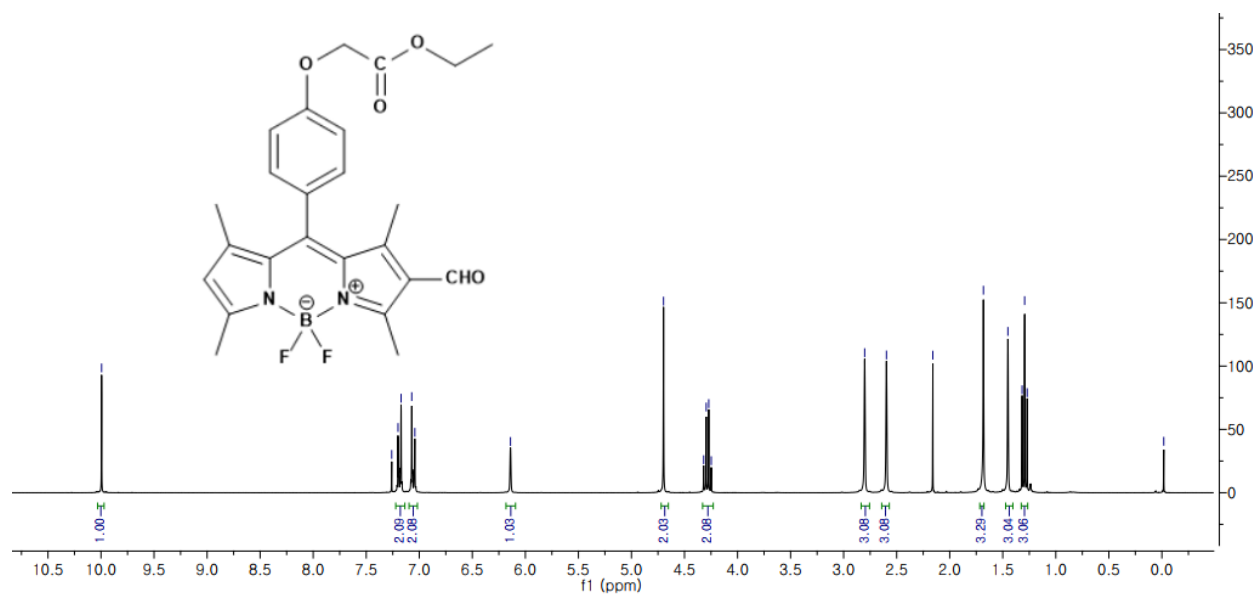

Figure S2. <sup>1</sup>H NMR spectrum of BODIPY 2 in CDCl<sub>3</sub> at 300 MHz.

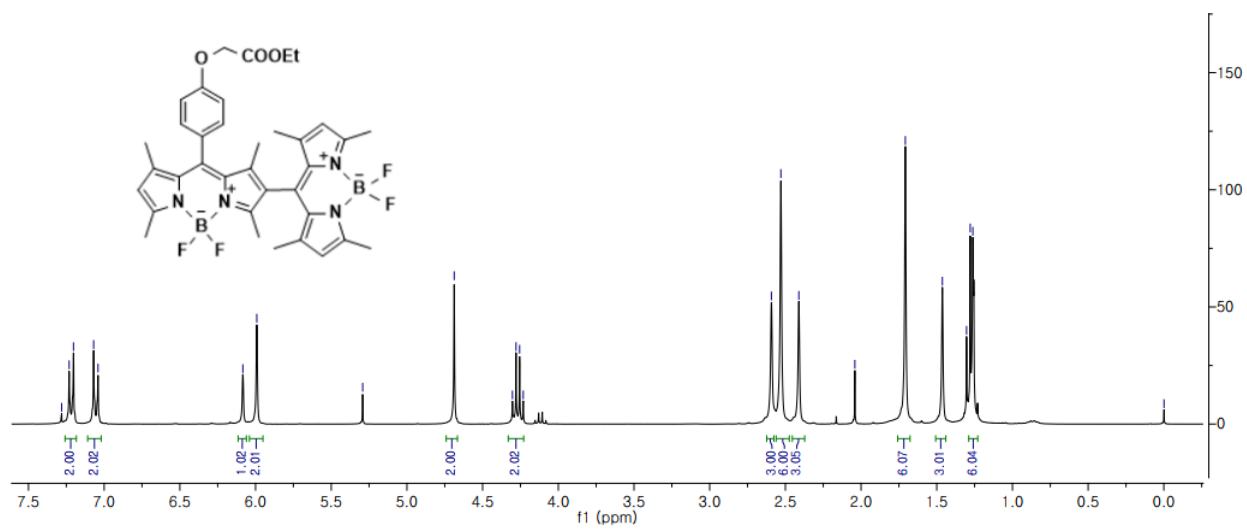

**Figure S3.**  $^1\text{H}$  NMR spectrum of BODIPY **3a** in  $\text{CDCl}_3$  at 300 MHz.

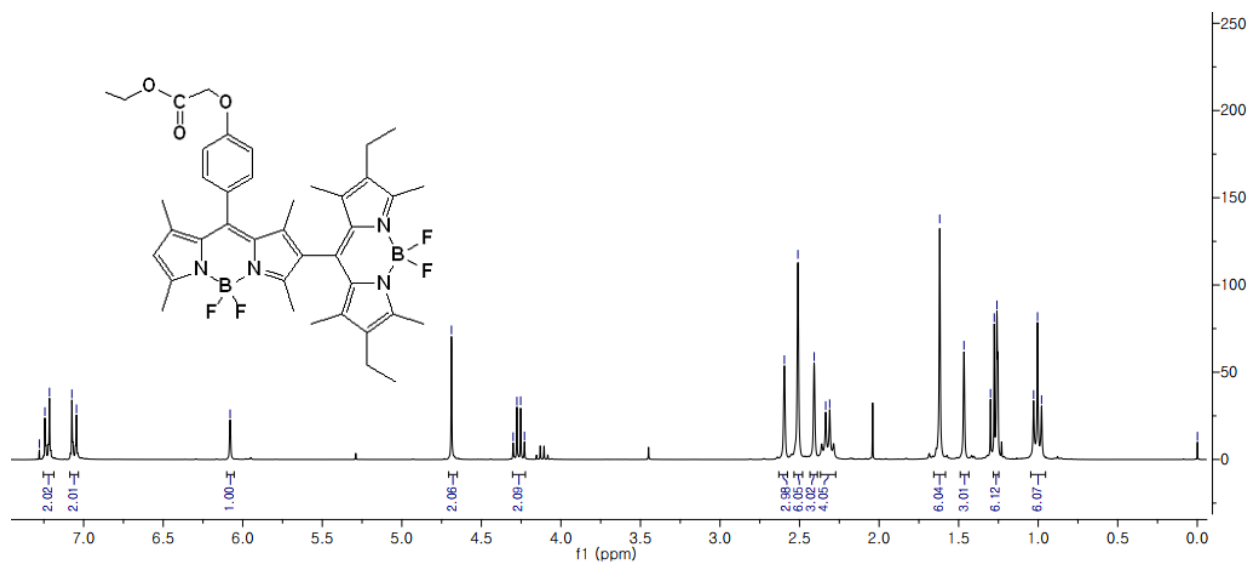

**Figure S4.**  $^1\text{H}$  NMR spectrum of BODIPY **3b** in  $\text{CDCl}_3$  at 300 MHz.

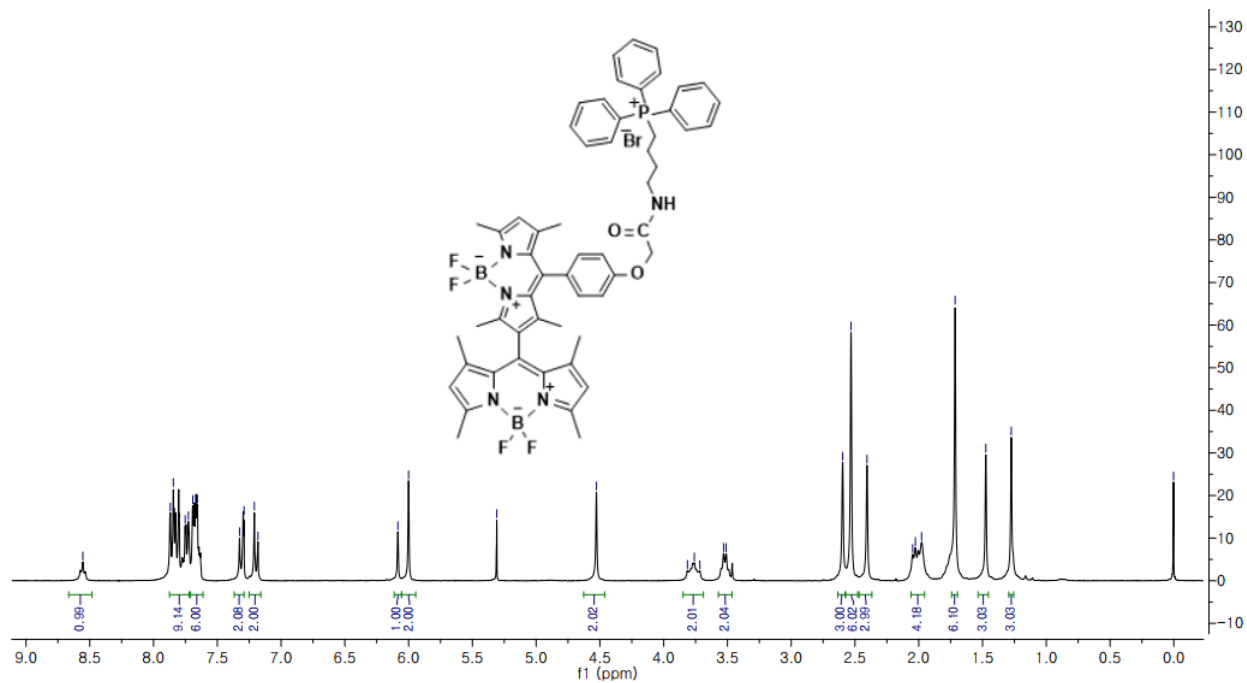

**Figure S5.** <sup>1</sup>H NMR spectrum of BODIPY BTTP in CDCl<sub>3</sub> at 300 MHz.

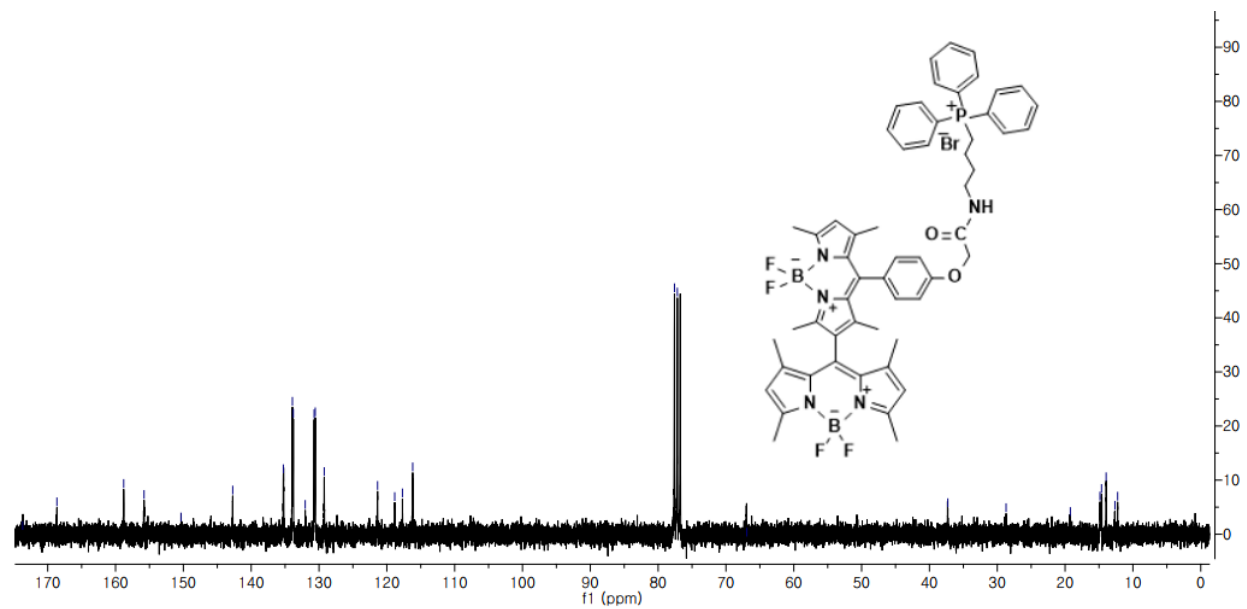

**Figure S6.** <sup>13</sup>C NMR spectrum of BODIPY BTTP in CDCl<sub>3</sub> at 75.4 MHz.

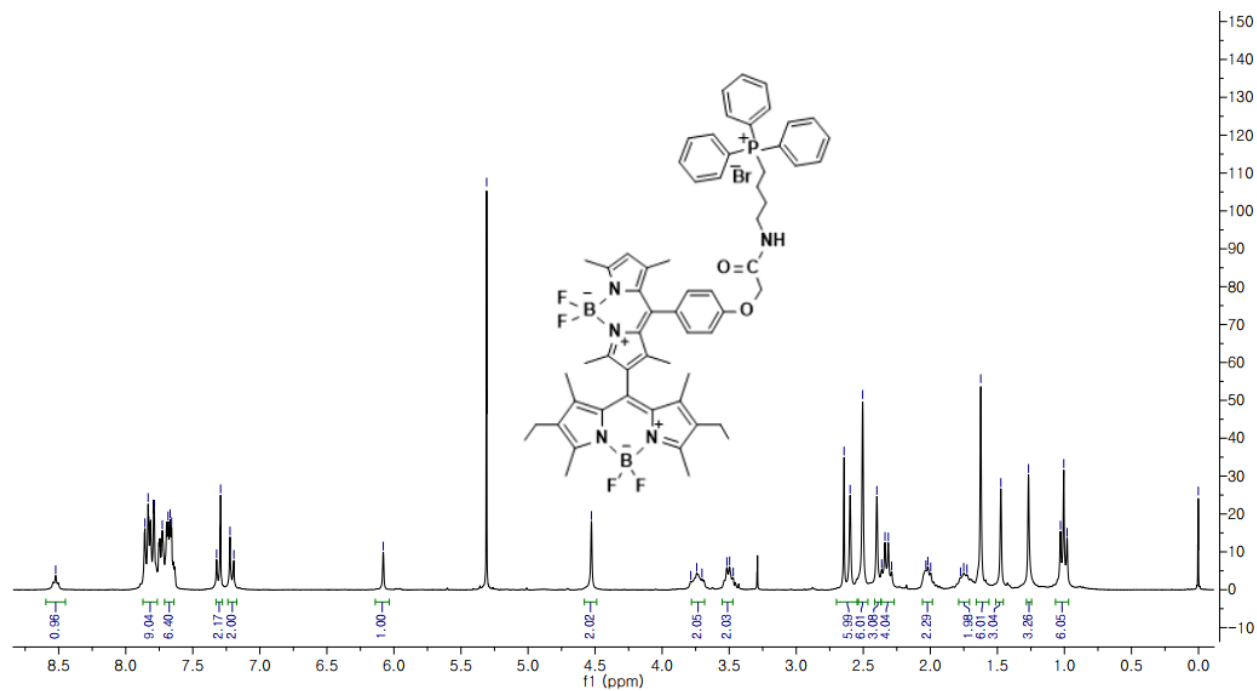

**Figure S7.**  $^1\text{H}$  NMR spectrum of BODIPY BeTPP in  $\text{CDCl}_3$  at 300 MHz.

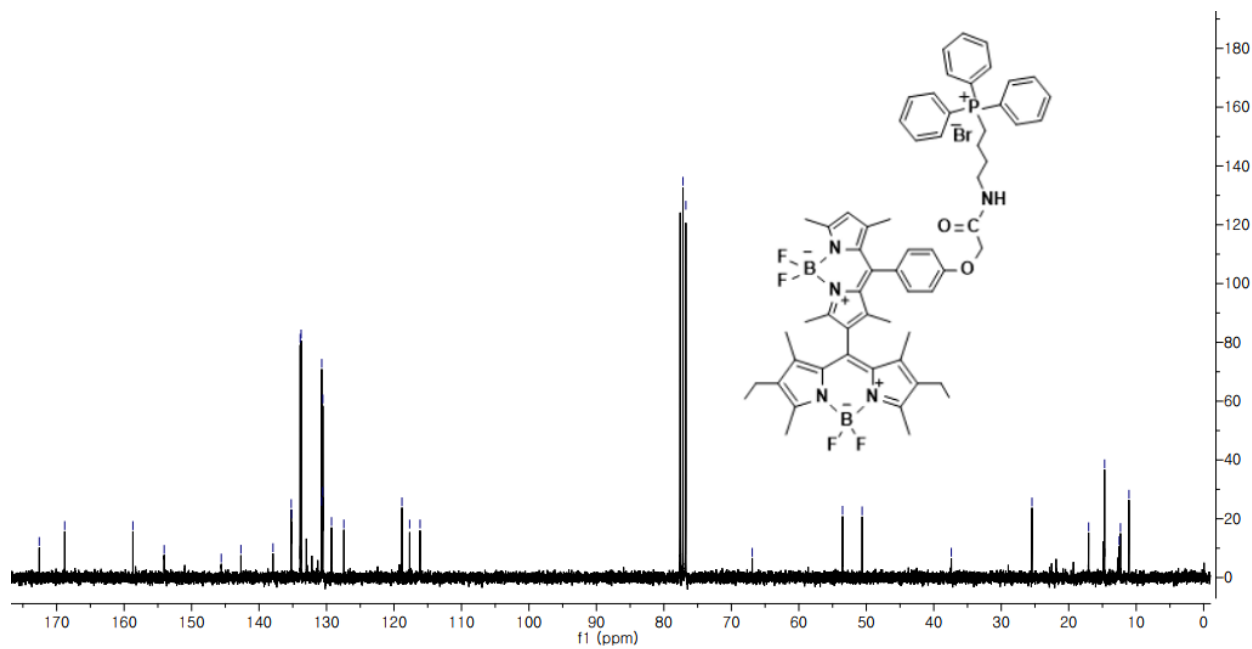

**Figure S8.**  $^{13}\text{C}$  NMR spectrum of BODIPY BeTPP in  $\text{CDCl}_3$  at 75.4 MHz.

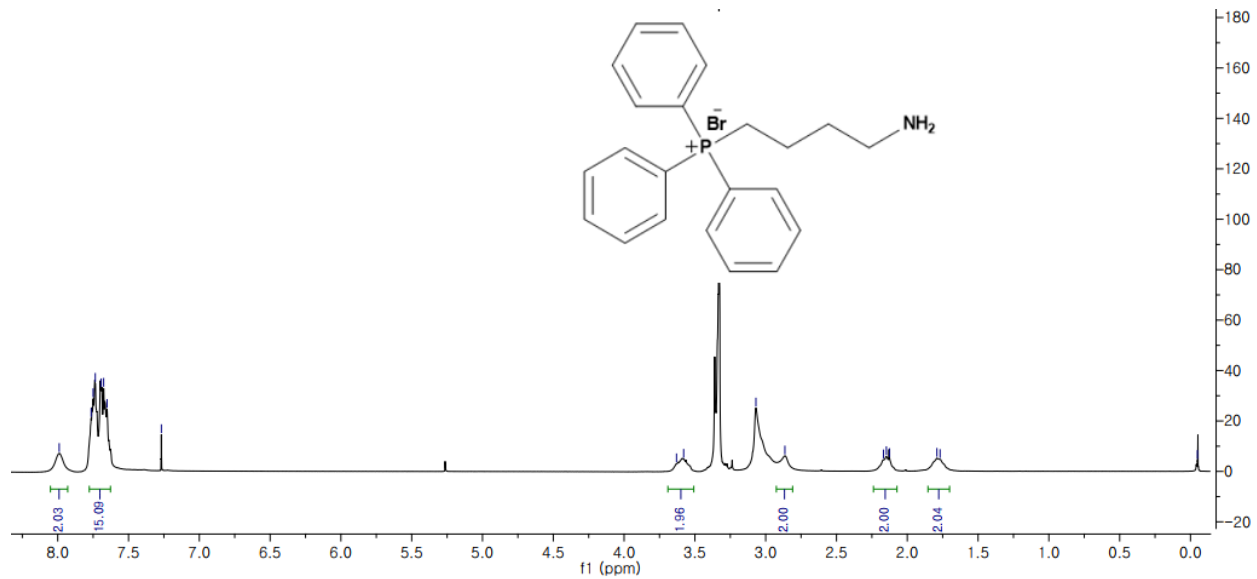

Figure S9.  $^1\text{H}$  NMR spectrum of TPP-NH<sub>2</sub> in CDCl<sub>3</sub> at 300 MHz.

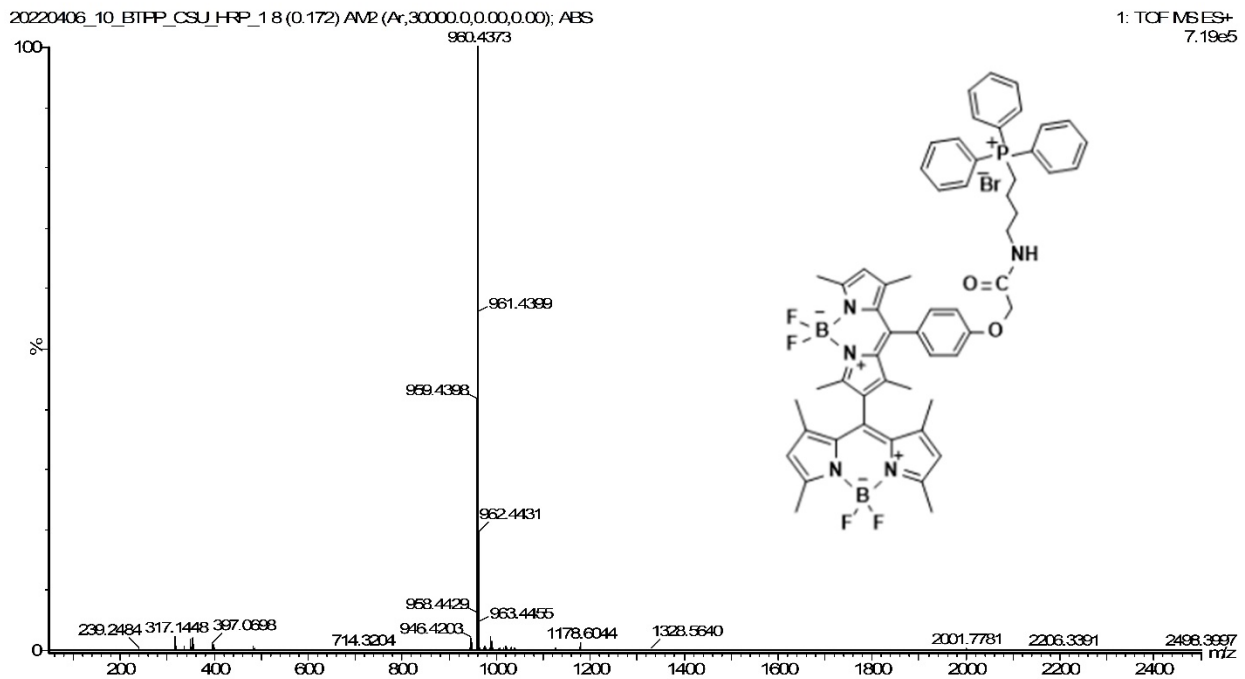

Figure S10. HR-MS spectrum of BODIPY BTTP.

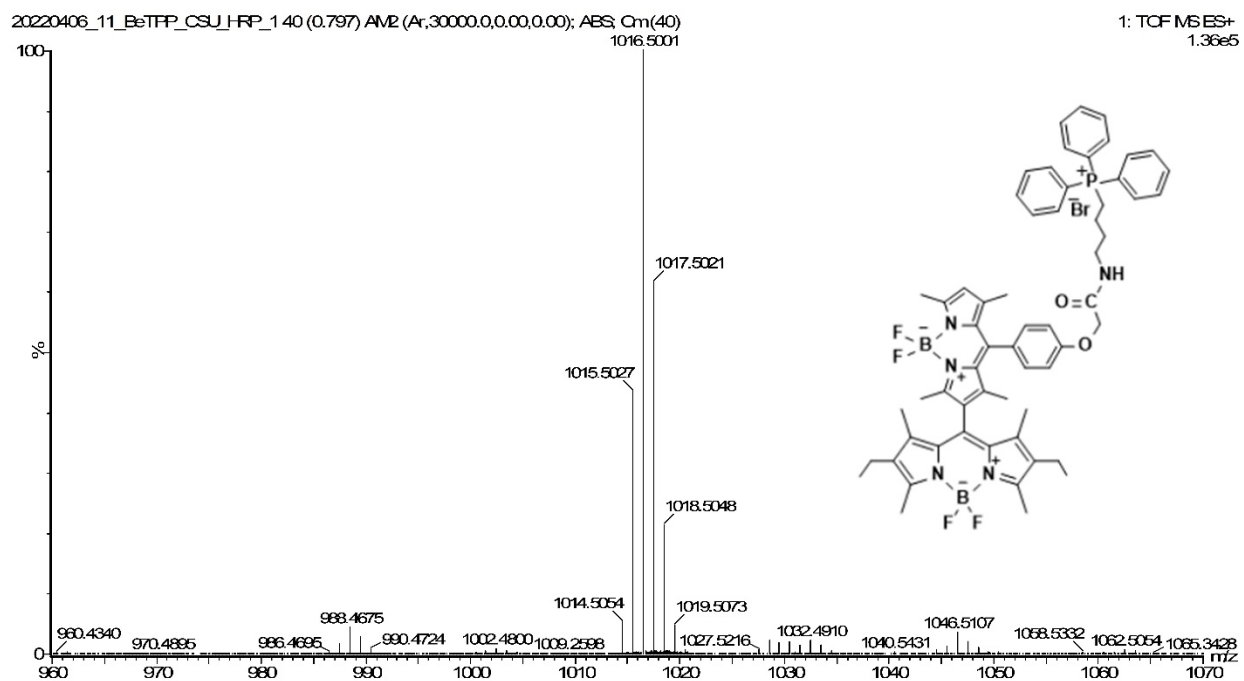

Figure S11. HR-MS spectrum of BODIPY BeTTP.

## S2. Emission spectra of BODIPY dimers in different solvents

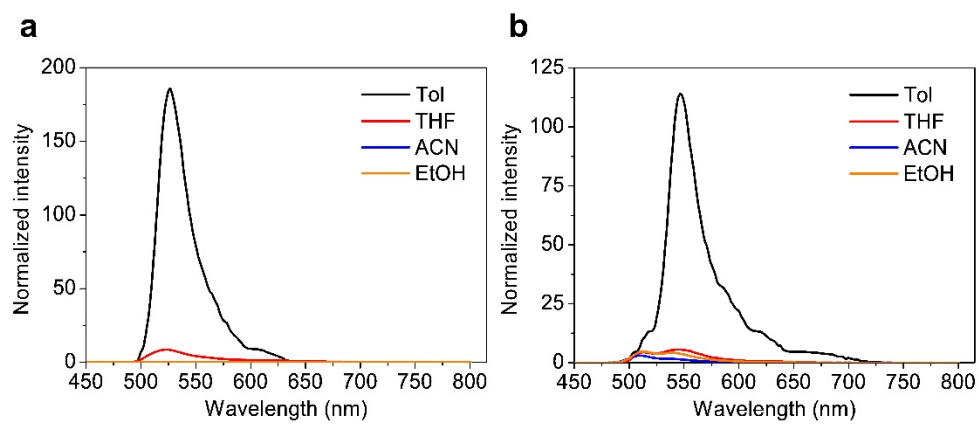

**Figure S12.** Fluorescence emission spectra of the BODIPY dimers, **BTPP** (a) and **BeTTP** (b) in various solvents. The fluorescence quenching appeared clearly up to the solvent polarity increase.



### S3. Emission spectra of BODIPY dimer-based NPs

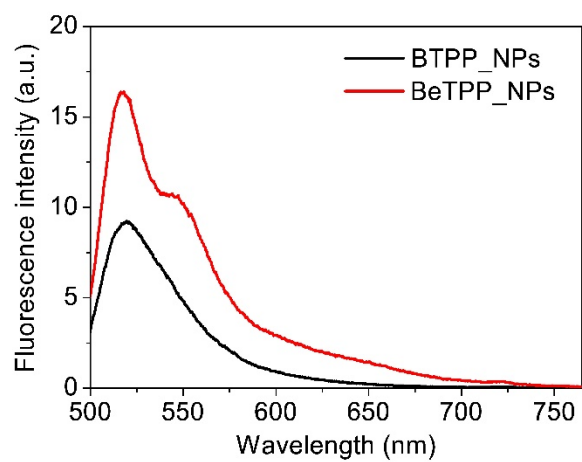

**Figure S13.** Fluorescence emission spectra of **BTTP** NPs and **BeTTP** NPs in aqueous media ( $3 \times 10^{-6}$  M,  $\lambda_{\text{ex}} = 480$  nm).

## S4. Determination of the $^1\text{O}_2$ quantum yield of BODIPY dimers

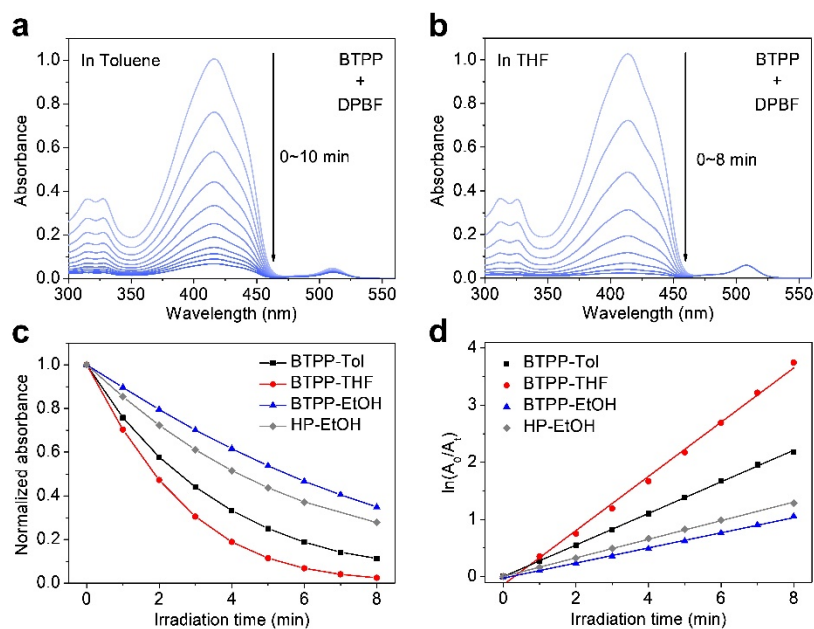

**Figure S14.** Absorption spectra of DPBF upon irradiation in the presence of **BTTP** in (a) toluene and (b) tetrahydrofuran (THF) under 520 nm for different times. (c) Plots of the change in absorbance of DPBF at 411 nm at different irradiation times using hematoporphyrin (HP) as the standard in EtOH at room temperature ( $\Phi_{\Delta} = 0.53$ ). (d)  $^1\text{O}_2$  assay using the absorbance attenuation of DPBF in the presence of **BTTP** in different solvents against HP as the standard in EtOH.

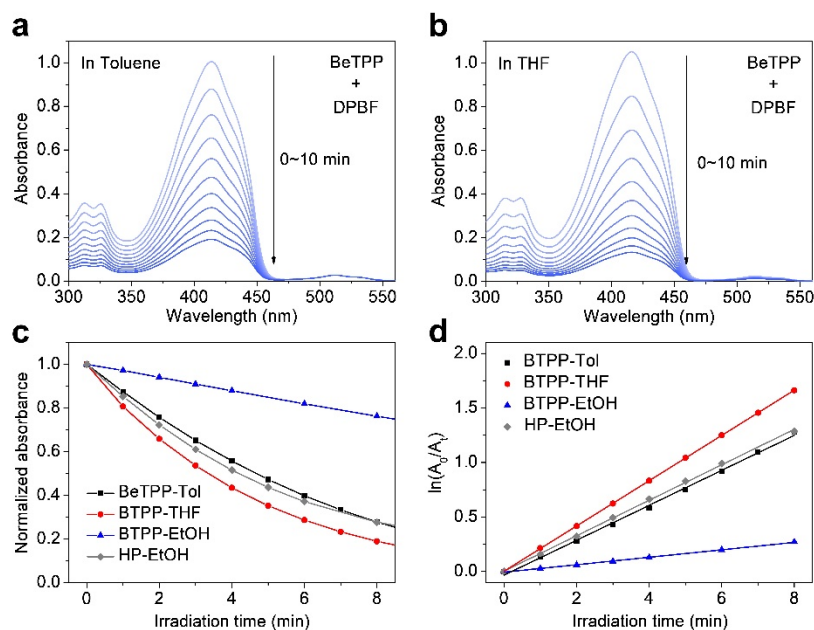

**Figure S15.** Absorption spectra of DPBF upon irradiation in the presence of **BeTTP** in (a) toluene and (b) tetrahydrofuran (THF) under 520 nm for different times. (c) Plots of the change in absorbance of DPBF at 411 nm at different irradiation times using hematoporphyrin (HP) as the standard in EtOH at room temperature ( $\Phi_{\Delta} = 0.53$ ). (d)  $^1O_2$  assay using the absorbance attenuation of DPBF in the presence of **BeTTP** in different solvents against HP as the standard in EtOH.

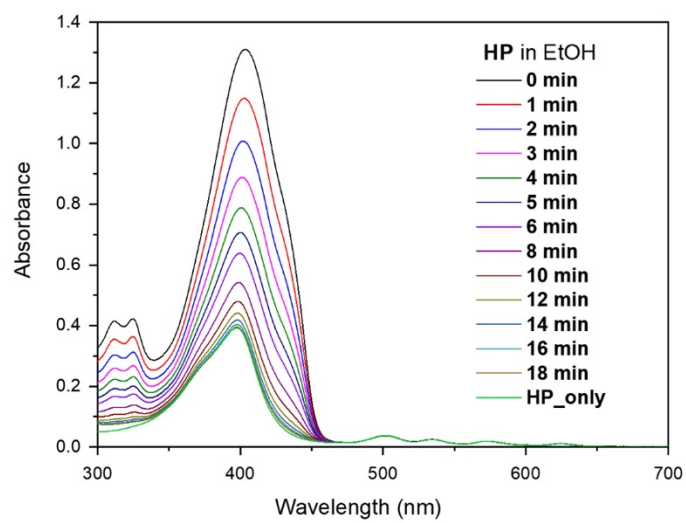

**Figure S16.** Absorption spectra of DPBF upon irradiation in the presence of HP in EtOH under 520 nm for different times.

## S5. Theoretical characterization of the complete molecular structure

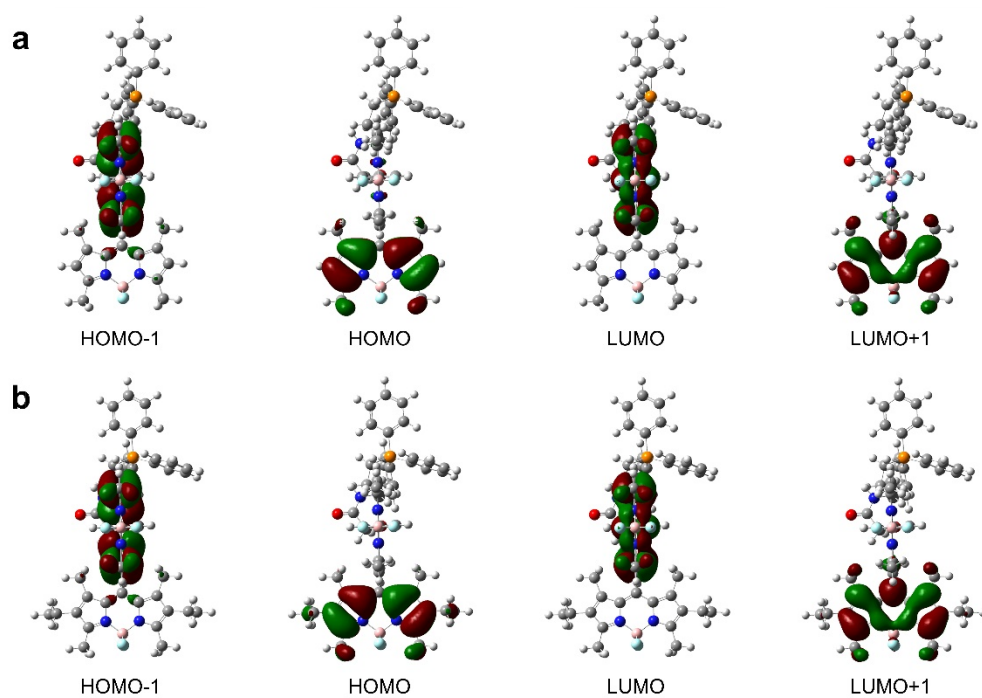

**Figure S17.** The frontier molecular orbitals of the **BTTP** (a) and **BeTPP** (b) for the complete structures.

**Table S1.** Transition energy (E), wavelength ( $\lambda$ ), and oscillator strength (f) for the two lowest singlet excited states of BODIPY **BTTP** and **BeTTP**, and the contribution of frontier orbitals to each transition.

The calculations were carried out under methanol solvent.

|              | State               | E (eV) | Wavelength (nm) | <i>f</i> | Major contributions to transition |
|--------------|---------------------|--------|-----------------|----------|-----------------------------------|
|              | S <sub>1</sub> (CT) | 2.43   | 509.4           | 0.0059   | HOMO → LUMO (99%)                 |
| <b>BTTP</b>  | S <sub>2</sub> (CT) | 2.52   | 492.0           | 0.0001   | HOMO-1 → LUMO+1 (97%)             |
|              | S <sub>3</sub> (LE) | 2.88   | 430.1           | 0.7578   | HOMO-1 → LUMO (96%)               |
|              | S <sub>1</sub> (CT) | 2.30   | 539.2           | 0.0062   | HOMO → LUMO (100%)                |
| <b>BeTTP</b> | S <sub>2</sub> (CT) | 2.57   | 481.6           | 0.0023   | HOMO-1 → LUMO+1 (97%)             |
|              | S <sub>3</sub> (LE) | 2.77   | 447.2           | 0.5372   | HOMO → LUMO +1 (92%)              |
